# Supplementary material
Source: publisher figshare collection journal article supplement (https://acs.figshare.com/ndownloader/files/3802771)
Supplement: Supplementary file 1 [file 3802771]

## SUPPORTING INFORMATION FOR

# Raman Characterization of Nanoparticle Transport in Microfluidic Paper-Based Analytical Devices ( $\mu$ PADs)

*Rebecca Halvorson Lahr, Grant C. Wallace, Peter J. Vikesland\**

Department of Civil and Environmental Engineering and Institute of Critical Technology and Applied Science (ICTAS), Virginia Tech, 418 Durham Hall, Blacksburg, VA 24060-0246

\*Corresponding author E-mail: pvikes@vt.edu; 540-231-3568; Fax: 540-231-7916

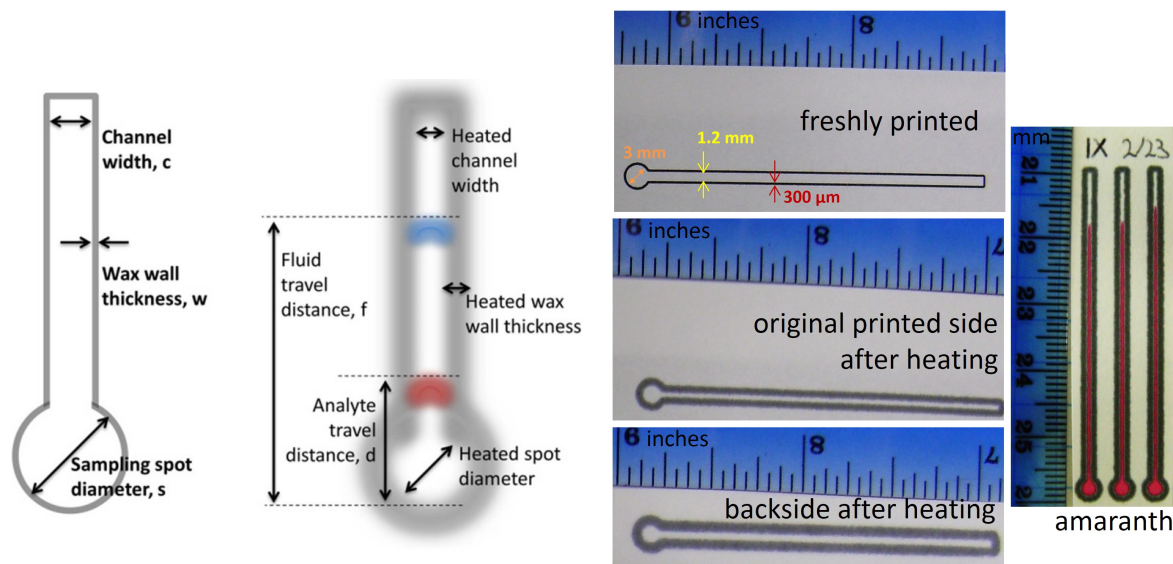

**Figure S1.** The  $\mu$ PAD dimensions describe measurements designed in Adobe Photoshop software (left). Heating the papers to re-flow the wax caused lateral as well as axial wax spreading, thus creating narrower channels in the tested  $\mu$ PADs than the original printed dimensions. Photographs of printed, heated  $\mu$ PADs containing amaranth dye demonstrate the ability of wax to contain aqueous solutions (right).

**#1 Design channels with Photoshop®**

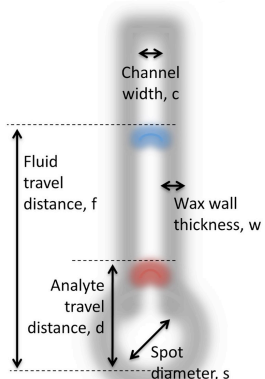

**#2 Print**

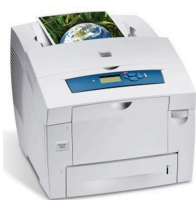

**#3 Heat**

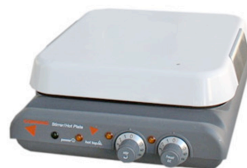

**#4 Apply sample, rinse as needed**

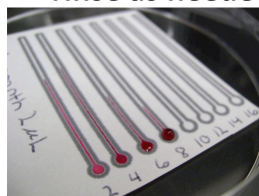

**#5 SERS and optical imaging**

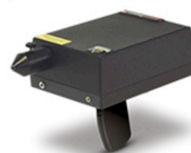

**#6 Measure**

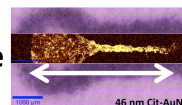

**Figure S2.** Flow chart of experiments performed for this work.

**Table S1.** Nanoparticle synthesis procedures. AuNP and AgNP were produced with the desired coatings using published protocols.

| Particle                                              | Synthesis Method                                                                                                                                                                                                                                                                                                                                                                                                                                                                                                                                                                                                                                                           | Refs.        |
|-------------------------------------------------------|----------------------------------------------------------------------------------------------------------------------------------------------------------------------------------------------------------------------------------------------------------------------------------------------------------------------------------------------------------------------------------------------------------------------------------------------------------------------------------------------------------------------------------------------------------------------------------------------------------------------------------------------------------------------------|--------------|
| 15 nm cit-AuNP                                        | Spiked 10 mL of 38.8 mM sodium citrate into 100 mL of hot 1 mM HAuCl <sub>4</sub> and refluxed until particles formed.                                                                                                                                                                                                                                                                                                                                                                                                                                                                                                                                                     | <sup>1</sup> |
| 46 nm cit-AuNP                                        | Spiked 1.6 mL of Abs = 3.0 of 15 nm Cit-AuNP seeds and 0.44 mL of 38.8 mM sodium citrate into 100 mL of hot 0.254 mM HAuCl <sub>4</sub> . Refluxed until particles formed (1 hr).                                                                                                                                                                                                                                                                                                                                                                                                                                                                                          | <sup>1</sup> |
| 15, 46, 64 nm BSA-cit-AuNP                            | Spike 0.1 mg BSA per mL of the appropriate size of Cit-AuNP.                                                                                                                                                                                                                                                                                                                                                                                                                                                                                                                                                                                                               | <sup>2</sup> |
| 46 nm MixPEG-cit-AuNP                                 | Added dropwise 1 $\mu$ M HS-PEG-COOH to 46 nm Cit-AuNP to achieve 3000 COOH-PEG molecules per AuNP. Particles were then mixed for 15 minutes before adding excess 10 $\mu$ M HS-PEG-OCH <sub>3</sub> to achieve 16000 OCH <sub>3</sub> -PEG molecules per AuNP. After mixing for an additional 15 minutes, AuNP were centrifuged and washed several times to remove excess PEG. The OCH <sub>3</sub> -PEG coated 46 nm AuNP (46 nm OCH <sub>3</sub> -PEG-cit-AuNP) and COOH-PEG coated 46 nm AuNP (46 nm COOH-PEG-cit-AuNP) were prepared similarly as 46 nm MixPEG-cit-AuNP except that a single type of PEG was used at a concentration of 19000 PEG molecules per AuNP. | <sup>3</sup> |
| 46 nm PEG-MGITC-cit-AuNP and 46 nm PEG-RBITC-cit-AuNP | Added 300 dye molecules per AuNP via syringe to a vortexing tube of 46 nm Cit-AuNP, incubated overnight at 4°C, and pegylated as described previously.                                                                                                                                                                                                                                                                                                                                                                                                                                                                                                                     | <sup>3</sup> |
| 46 nm DNA-PEG-MGITC-cit-AuNP                          | Added 50 $\mu$ L of 4 mg/mL EDC in PBS and 55 $\mu$ L of 10 mg/mL sulfo-NHS in PBS to 1 mL of 10 <sup>10</sup> 46 nm PEG-MGITC-AuNP in PBS buffer. Twelve nmol of oligonucleotide were then added in 200 $\mu$ L to the AuNP solution before shaking overnight at room temperature, while protected from light. Excess reagents were removed by centrifugation (5 rounds at 10000 $\times$ g for 10 minutes each). All PEG coated AuNP were stored in the dark at 4°C in 50% (v/v) ethanol-water solutions and re-suspended in nanopure water before use.                                                                                                                  | <sup>3</sup> |
| 46 nm PEG-Peptide-cit-AuNP                            | A 0.1 mL spike of 380 $\mu$ M peptide was added to 50 mL of 46 nm Cit-AuNP to achieve 10000 peptides per AuNP. After stirring for 2 hours at room temperature, 100 $\mu$ M OCH <sub>3</sub> -PEG-HS was added to a molar ratio of 9000 PEG molecules per AuNP. The solution was incubated at room temperature overnight.                                                                                                                                                                                                                                                                                                                                                   | <sup>3</sup> |
| 36 nm EDTA-AgNP                                       | Vigorously shook a mixture containing 100 mL of 0.16 mM EDTA and 4 mL of 0.1 M NaOH spiked with 1 mL of 26 mM AgNO <sub>3</sub> .                                                                                                                                                                                                                                                                                                                                                                                                                                                                                                                                          | <sup>4</sup> |
| 8 nm PVP10K-AgNP and 8 nm PVP55K-AgNP                 | PVP (1.5 g of 10 kDa or 55 kDa) was dissolved in 280 mL water, mixed with 9 mL of 0.1 M AgNO <sub>3</sub> , stirred 5 min, spiked with 11 mL of 0.08 M ice-cold sodium borohydride, and centrifuged to remove excess reagent.                                                                                                                                                                                                                                                                                                                                                                                                                                              | <sup>5</sup> |
| 41 nm PVP10K-AgNP and 40 nm PVP55K-AgNP               | PVP was dissolved in ethylene glycol (1.5 g of 10 kDa in 75 mL or 20 g of 55 kDa in 50 mL), mixed with AgNO <sub>3</sub> (0.05 g or 1.5 g), heated under stirring (120°C for 1 hr or 140°C for 24 hr), and dialyzed or centrifuged to remove unbound species.                                                                                                                                                                                                                                                                                                                                                                                                              | <sup>4</sup> |
| AuNR                                                  | HAuCl <sub>4</sub> was mixed with CTAB and reduced with sodium borohydride to produce 1.5 nm spherical AuNP. AuNP were further grown in the presence of CTAB, AgNO <sub>3</sub> , HAuCl <sub>4</sub> , and ascorbic acid overnight at 33 °C. Centrifugation removed excess CTAB.                                                                                                                                                                                                                                                                                                                                                                                           |              |

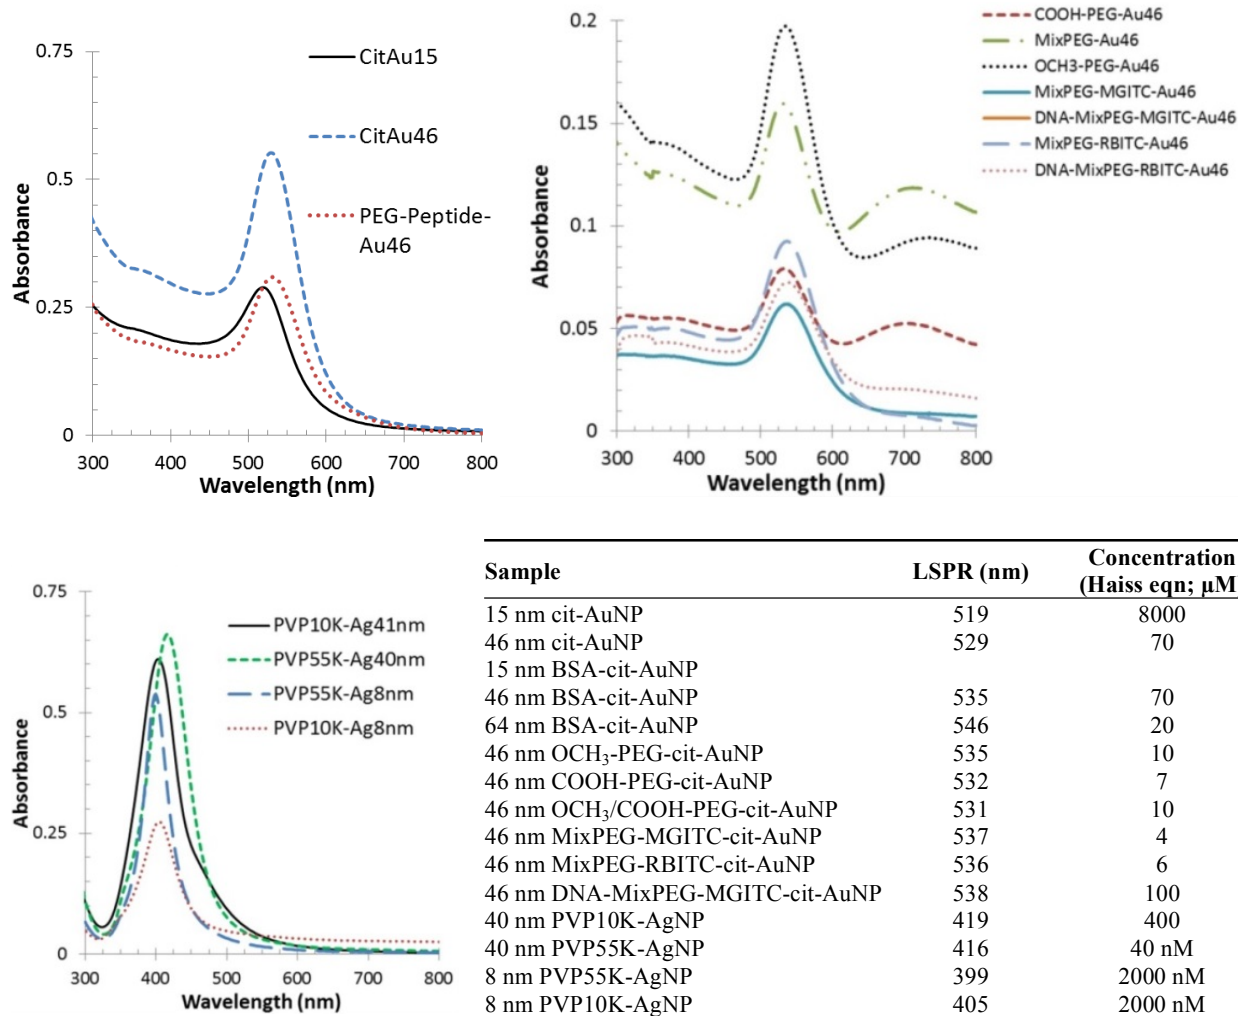

**Figure S3.** UV-Vis spectra and LSPR maximum of aqueous nanoparticle solutions.<sup>6</sup>



**Table S2.** Raman peak assignments for the 55-398 cm<sup>-1</sup> region.

| SERS peaks (cm <sup>-1</sup> ) | Reported assignments                                                | Reference |
|--------------------------------|---------------------------------------------------------------------|-----------|
| 120-158                        | gold surface binding with I <sup>-</sup>                            | 7         |
| 152                            | S-S-S and S-S (with 216 cm <sup>-1</sup> and 471 cm <sup>-1</sup> ) | 8         |
| 180                            | gold surface binding with SO <sub>4</sub> <sup>-2</sup>             | 9         |
| 181-209                        | gold surface binding with Br <sup>-</sup>                           | 7,9       |
| 216                            | S-S-S and S-S (with 152 cm <sup>-1</sup> and 471 cm <sup>-1</sup> ) | 8         |
| 225-227                        | Ag(0) - N                                                           | 10        |
| 230-260                        | Plasmon - phonon coupling                                           | 11        |
| 235                            | Au(0) – S of SCN                                                    | 7         |
| 240                            | Ag(0) - N of benzyolpyridine                                        | 10        |
| 240-250                        | Ag(0) – Cl <sup>-</sup>                                             | 9         |
| 245-275                        | Ag(0) – Cl <sup>-</sup>                                             | 7,9       |
| 250-260                        | Cyano groups binding to a gold surface through the nitrogen atom    | 9         |
| 254                            | S-S-S                                                               | 8         |
| 260                            | Extramolecular stretching of Au-C                                   | 12        |
| 260                            | Au-S                                                                | 13        |
| 261                            | S-S-S                                                               | 8         |
| 267                            | Au(0)-S of cysteine                                                 | 14        |
| 270-310                        | Au-S                                                                | 8         |
| 296                            | Au-S                                                                | 15        |
| 300                            | Au(0)-N of NCS                                                      | 7         |
| 300 and 380                    | Au(0)-CN                                                            | 7         |
| 471                            | S-S-S and S-S (with 152 cm <sup>-1</sup> and 216 cm <sup>-1</sup> ) | 8         |
| 330                            | Extramolecular stretching of Au–O                                   | 12        |

**Table S3.** Specific instrument parameters used to collect Raman and SERS spectra of each analyte. All spectra were collected in paper using a 785 nm laser, 300 grooves per mm grating, and 10× microscope objective.

| Sample                   | Acquisition time (seconds) | Number of averaged spectra                                                            | Approximate laser power (mW) |
|--------------------------|----------------------------|---------------------------------------------------------------------------------------|------------------------------|
| Cellulose                | 1                          | 10                                                                                    | >100                         |
| Wax melted on paper      | 1                          | 10                                                                                    | >100                         |
| Amaranth                 | 1                          | 10                                                                                    | > 100                        |
| 15 nm Cit-AuNP           | 0.05                       | 120000 spectra over a 6000 $\mu\text{m} \times$ 1000 $\mu\text{m}$ Raman spectral map | < 0.3                        |
| 46 nm Cit-AuNP           | 0.01                       | 145000 spectra over a 7000 $\mu\text{m} \times$ 1000 $\mu\text{m}$ Raman spectral map | < 0.3                        |
| DNA-PEG-MGITC-cit-AuNP   | 0.01                       | 40000 spectra over a 2000 $\mu\text{m} \times$ 2000 $\mu\text{m}$ Raman spectral map  | < 5                          |
| AuNR                     | 0.01                       | 40000 spectra over a 2000 $\mu\text{m} \times$ 2000 $\mu\text{m}$ Raman spectral map  | < 5                          |
| 46 nm PEG-MGITC-cit-AuNP | 0.01                       | 2500 spectra over a 1000 $\mu\text{m} \times$ 1000 $\mu\text{m}$ Raman spectral map   | < 25                         |
| 46 nm PEG-RBITC-cit-AuNP | 0.01                       | 2500 spectra over a 1000 $\mu\text{m} \times$ 1000 $\mu\text{m}$ Raman spectral map   | < 25                         |
| 46 nm BSA-cit-AuNP       | 0.05                       | 80000 spectra over a 8000 $\mu\text{m} \times$ 500 $\mu\text{m}$ Raman spectral map   | < 0.6                        |
| 64 nm BSA-cit-AuNP       | 0.05                       | 80000 spectra over a 8000 $\mu\text{m} \times$ 500 $\mu\text{m}$ Raman spectral map   | < 0.6                        |
| 41 nm PVP10K-AgNP        | 0.05                       | 20000 spectra over a 2000 $\mu\text{m} \times$ 500 $\mu\text{m}$ Raman spectral map   | < 0.6                        |

### Characterization of wax ink, papers, and $\mu\text{PADs}$ .

The Xerox ColorQube ink melts below 120  $^{\circ}\text{C}$ , a lower re-flow temperature than the original Xerox ink, and is likely composed of carbon black pigment and hydrophobic polymer or hydrocarbon mixture (**Table S4**).<sup>16-21</sup> The wax re-flow process caused wax spreading within the paper from an initial printed wax dimension of 0.3 mm to a heated dimension of approximately 0.8 mm to 1.1 mm for the back of the paper and the original printed side respectively (**Figure S1**).<sup>16</sup> FE-SEM shows smooth regions on the cellulose fibers after wax re-flow that are not observed on the cellulose fibers without wax (**Figure S4**).

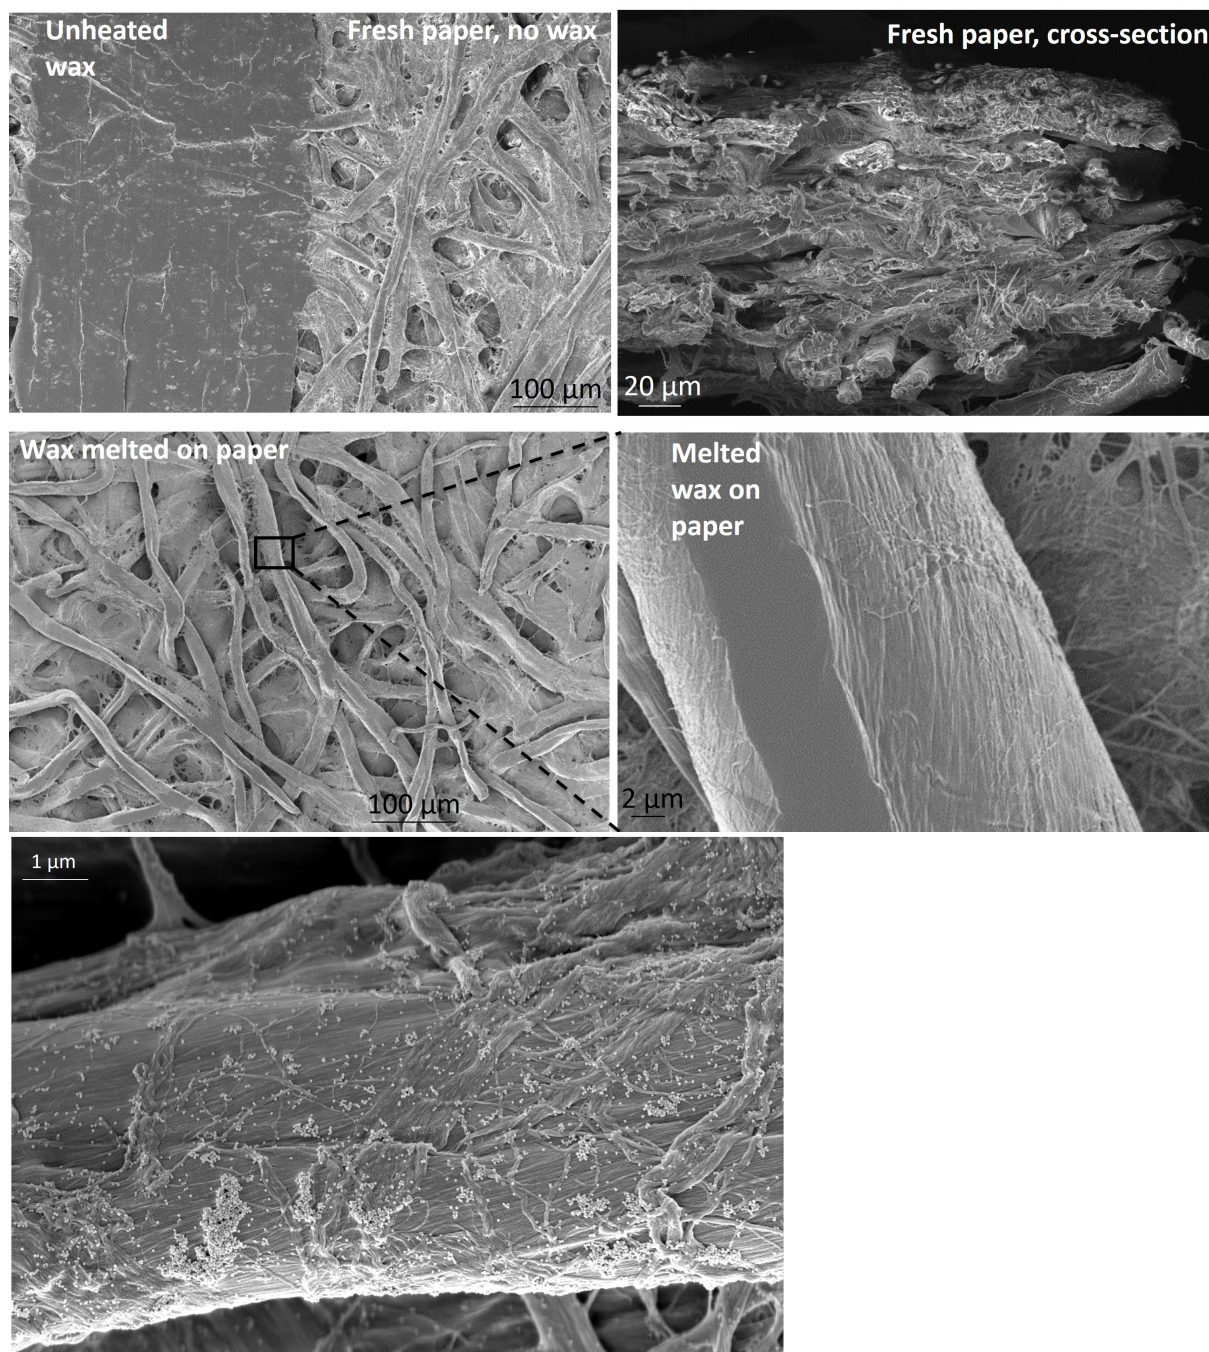

**Figure S4.** FE-SEM images of Whatman grade 1 chromatography paper before and after heating including a) an un-heated wax-printed paper, b) a cross-section of chromatography paper without wax (sample frozen in liquid nitrogen, cut with a cold scalpel blade while still frozen, mounted onto an SEM stub, and sputter coated with Au for analysis), c) melted wax on paper, d) a close-up image of a wax-coated cellulose fiber, and e) a cellulose fiber on which 40 nm cit-AuNP were deposited. The relative scale of the nanomaterials with respect to the “sinusoidal corrugated” cellulose fiber surface, assumed to be smooth and flat by the DLVO model, is demonstrated.<sup>22</sup>

**Table S4.** Assignments for Raman peaks displayed by wax ink. The composition of the phase changing ink is proprietary, but likely contains carbon black pigment and a hydrophobic hydrocarbon mixture or polymer.<sup>16,19-21</sup>

| Peak (cm <sup>-1</sup> ) | Molecular Vibration                                                                                                 | Reference |
|--------------------------|---------------------------------------------------------------------------------------------------------------------|-----------|
| 569                      | Ring vibrations, NO <sub>2</sub> , nitric acid esters, aromatics                                                    | 23,24     |
| 746                      | Ring breathing mode, CH deformation, CC, earth wax                                                                  | 24,25     |
| 818                      | C-C stretching, cyclohexane, ring vibration                                                                         | 23,24     |
| 889                      | Methylene rocking, cyclopentane, ring vibration, CH <sub>2</sub> , COC, unsaturated and saturated waxes             | 23-25     |
| 904                      | C-O-C, ring vibrations                                                                                              | 23,24     |
| 1213                     | Aromatic stretching, C-N stretching, methyl rocking, COC, C=C-O-C                                                   | 23,24     |
| 1241                     | C=C-O-C, COC, phosphate, NO <sub>2</sub> ,                                                                          | 23,24     |
| 1287                     | Aromatics, nitric acid esters, pyrimidine bases, phosphodiester                                                     | 23,24     |
| 1333-1351                | Carbon black, branched hydrocarbon chains, phenyl, CH <sub>3</sub> , CH <sub>2</sub> , CH, NO <sub>2</sub>          | 24,26,27  |
| 1454                     | CH <sub>3</sub> and CH <sub>2</sub> modes, phospholipids, cyclopentane derivatives, unsaturated and saturated waxes | 23-25,28  |
| 1564                     | COO-, purine bases, ring breathing modes, N-NO <sub>2</sub>                                                         | 23,24     |
| 1580                     | Carbon black                                                                                                        | 26,27     |

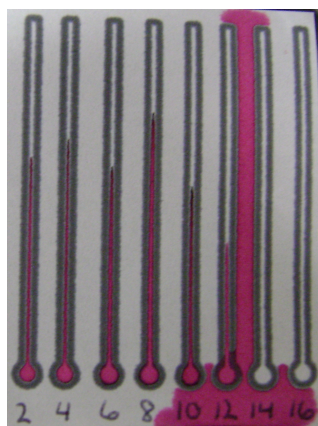

**Figure S5.** Wax-printed paper channels (1.2 mm channel width, 0.3 mm wax walls, and 3 mm sampling spots, original printed side up in a Petri dish) typically contained amaranth solutions up to a volume of 12  $\mu$ L. Samples > 12  $\mu$ L typically spilled out of channels.



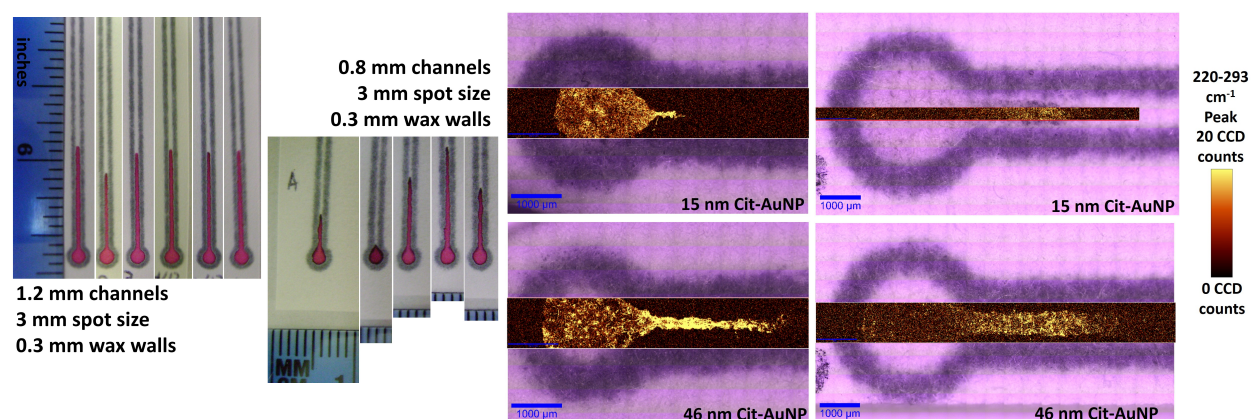

**Figure S6.** Normal Raman spectral maps image the topography of the cellulose fibers and deposition patterns of fluorescent species even within the same wax-printed paper channel (Figure S7), while the SERS spectral maps are generated with a low enough laser power such that only nanomaterials display spectra. Optical images collected using a 10× microscope objective (purple) and overlaid SERS spectral maps demonstrate nanoparticle deposition patterns within the wax-printed cellulose channels. SERS Spectral images were collected with a 785 nm laser, 300 gr/mm grating, 10× microscope objective, 0.05 seconds per spectrum, and 5 to 10 spectra per  $\mu\text{m}$ . Channel dimensions were chosen to produce the most consistent fluid flow and strong SERS signals. Narrow channels concentrated samples to facilitate strong SERS signals, but the spread of the wax caused channels narrower than 1.2 mm to periodically constrict flow as observed in the photographs on the left. Nanoparticles are still observed within channels over 1.2 mm wide, though longer acquisition times, SERS tags bound to nanoparticles, or higher laser powers are often required.

Contact angle measurements were collected for water droplets on the wax ink block, heated and unheated wax printed on chromatography paper, and water-soaked printed papers. As suggested by Noh and Phillips, wax-printed paper absorbs water droplets if given sufficient time after deposition; hence, water droplets were analyzed immediately after placement on the sample.<sup>29</sup> After heating for wax re-flow, the original wax-printed side of the paper (front) had a higher contact angle than the back of the paper when both samples were not pre-wetted, indicating that the original printed side retains most of the wax thus making it more hydrophobic (**Table S5**). The hydrophobicity and the clear difference in the amount of wax spreading between the two sides of the paper explain the dependence of solution flow upon the orientation of the paper (original printed side up or down). Contact angles were consistently lower for papers that were pre-wetted before measurements were collected. The water adsorption properties of cellulose are well documented, and although high purity cotton cellulose such as that in Whatman grade 1 chromatography paper sorbs less water than other types of cellulose,<sup>30</sup> the dry or pre-wetted state remains an important variable to hold constant or engineer to improve functionality of wax-printed paper devices. For consistency, the nanoparticle transport

experiments reported here were conducted with dry papers as purchased and stored on a lab bench.

**Table S5.** Contact angle (degrees) measurements for wax on cellulose.

|                                                        | Advancing Contact Angle<br>(°) |                   | Receding Contact Angle<br>(°) |                   |
|--------------------------------------------------------|--------------------------------|-------------------|-------------------------------|-------------------|
|                                                        | dry sample                     | pre-wetted sample | dry sample                    | pre-wetted sample |
| <b>Black Wax</b>                                       | 113±6                          |                   | 94±7                          |                   |
| <b>Unheated wax-printed paper</b>                      | 113±2                          | 110±2             | 99±2                          | 92±4              |
| <b>Heated wax-printed paper, original printed side</b> | 142±3                          | 106±24            | 115±22                        | 92±7              |
| <b>Heated wax-printed paper, back of paper</b>         | 138±1                          | 117±5             | 107±1                         | 96±2              |
| <b>Paper (no wax)</b>                                  | 0                              | 0                 | 0                             | 0                 |

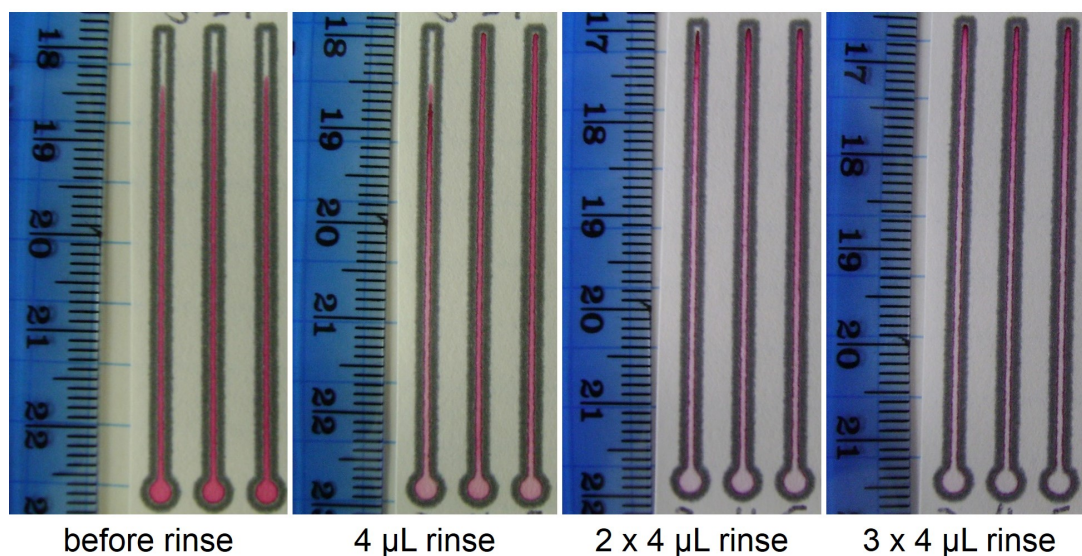

**Figure S7.** Amaranth dye deposited within the sampling spot (2  $\mu\text{L}$ ) travels with the aqueous phase through the paper. After at least 10 minutes of drying time and a 4  $\mu\text{L}$  water rinse placed in the sampling spot, the amaranth is rinsed further along the channel. Additional rinse steps further concentrate the amaranth dye at the end of the channel.

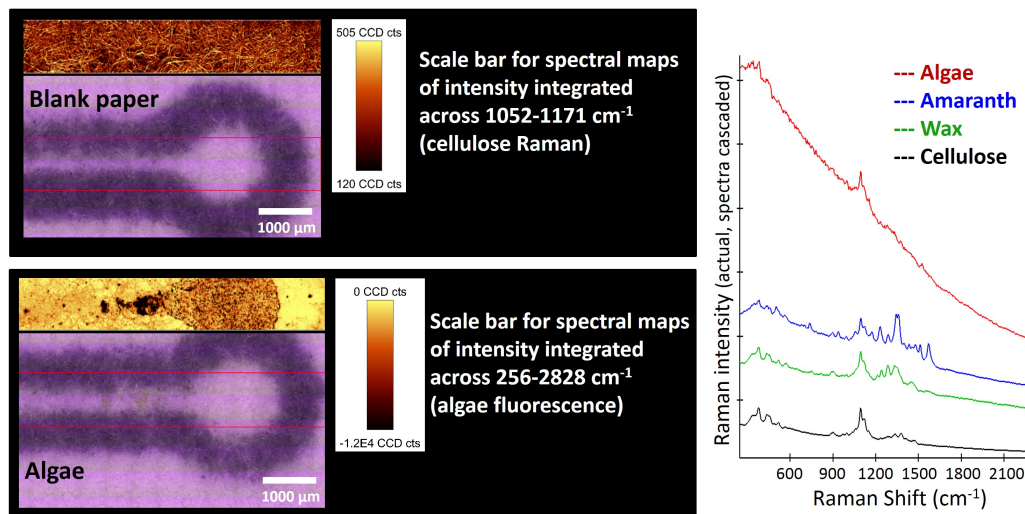

**Figure S8.** Normal Raman spectral maps image the topography of the cellulose fibers and deposition patterns of fluorescent species such as algal cells, even within the same wax-printed paper channel. Raman spectral images were collected with a 785 nm laser, 10× microscope objective, 300 grooves/mm grating, approximately 40 mW of laser power, and 0.05 seconds per spectrum.

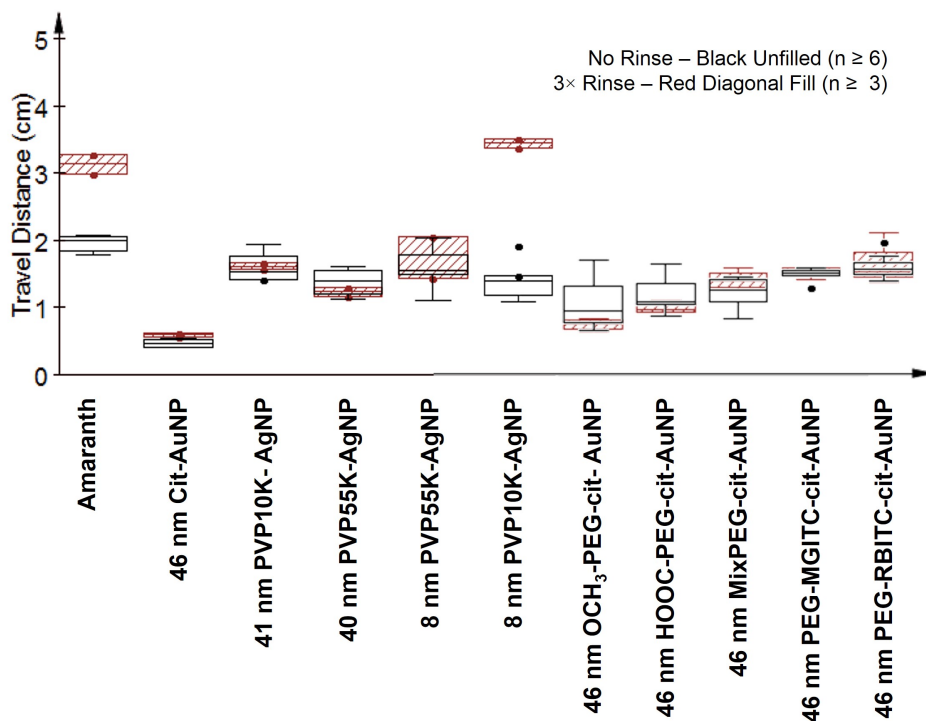

**Figure S9.** Rinsing three times with 4  $\mu\text{L}$  of nanopure water (12  $\mu\text{L}$  total) had no influence on nanoparticle travel distances except for 8 nm PVP10K-AgNP.

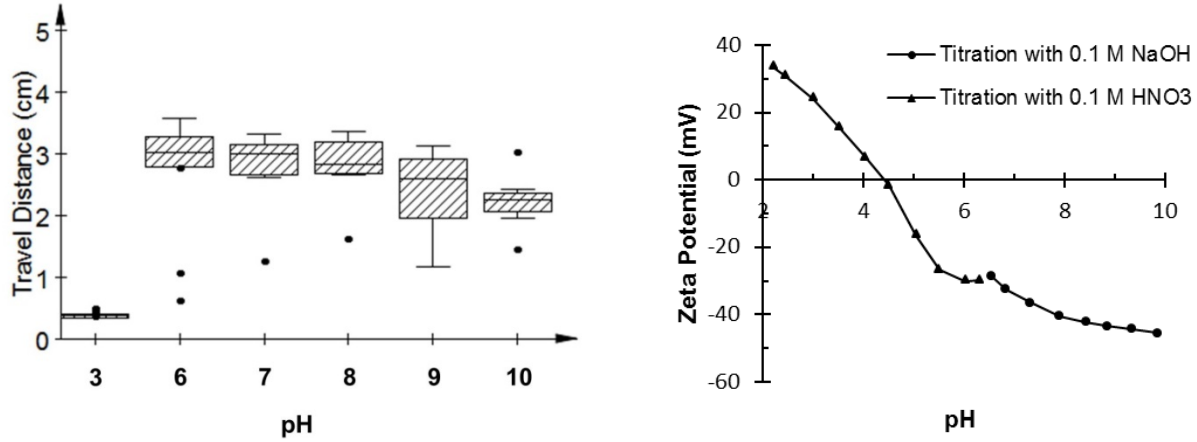

**Figure S10.** Travel distance (n=9) and zeta potential of 15 nm BSA-cit-AuNP as a function of pH. BSA-cit-AuNP were colloiddally unstable at pH 4 and 5; therefore, they were not examined in the channels.

### DLVO calculations

DLVO calculations were conducted to examine the attractive and repulsive forces between each nanoparticle and the cellulose surface using zeta potential, hydrodynamic diameter, Hamaker constants estimated from literature values, and ionic strength estimated from conductivity and reagent concentrations employed during synthesis (Table S6).<sup>31,32</sup>

*Eqn 1 Lifshitz-van der Waals interaction:*

$$U_{123}^{LW} = -\frac{A_{123}a_1}{6h} \left(1 + \frac{14h}{\lambda}\right)^{-1}$$

*Eqn 2 Electrostatic interaction:*

$$U_{123}^{EL} = \pi\epsilon_r\epsilon_0a_1 \left[ 2\zeta_1\zeta_3 \ln \left( \frac{1+e^{-\kappa h}}{1-e^{-\kappa h}} \right) + (\zeta_1^2 + \zeta_3^2) \ln(1 - e^{-2\kappa h}) \right]$$

*Eqn 3 Inverse Debye length:*

$$\kappa = \sqrt{\frac{2N_A e^2 \sum c_i z_i^2}{\epsilon_r \epsilon_0 k_B T}}$$



**Table S6.** DLVO model parameters.<sup>32</sup>

| Eqn            | Description                                                                                        | Symbol           | Value                                      | Units              |
|----------------|----------------------------------------------------------------------------------------------------|------------------|--------------------------------------------|--------------------|
| $U_{123}^{LW}$ | Hamaker constant between particle surface 1 and flat plate surface 3 separated by aqueous medium 2 | $A_{123}$        | Estimated (See Table S8)                   | N m                |
|                | Radius of particle (surface) 1                                                                     | $a_1$            | Measured hydrodynamic diameter (z-average) | m                  |
|                | Distance between surface 1 and surface 3                                                           | $h$              | Variable                                   | m                  |
|                | Characteristic wavelength of the dielectric                                                        | $\lambda$        | 0.0000001                                  | m                  |
| $U_{123}^{EL}$ | pi                                                                                                 | $\pi$            | 3.141592654                                |                    |
|                | Permittivity of the vacuum                                                                         | $\epsilon_0$     | $8.85 \times 10^{-12}$                     | F m                |
|                | Relative dielectric constant for water @ T (298 K)                                                 | $\epsilon_r$     | 78.5                                       |                    |
|                | Surface (zeta) potential of particle surface 1                                                     | $\zeta_1$        | Measured                                   | NmC <sup>-1</sup>  |
|                | Surface (zeta) potential of flat plate surface 3 (cellulose literature value) <sup>22,33</sup>     | $\zeta_3$        | -0.0377                                    | NmC <sup>-1</sup>  |
| <b>K</b>       | Avogadro's Number                                                                                  | $N_A$            | $6.022 \times 10^{23}$                     | mol <sup>-1</sup>  |
|                | Elementary charge                                                                                  | $e$              | $1.602 \times 10^{-19}$                    | C                  |
|                | Ionic strength estimated from conductivity <sup>34</sup>                                           | $\sum c_i z_i^2$ | Measured indirectly (See Table S8)         | mol/m <sup>3</sup> |
|                | Boltzmann's Constant                                                                               | $k_B$            | $1.381 \times 10^{-23}$                    | J/K                |
|                | Temperature                                                                                        | $T$              | 298                                        | K                  |
|                | Inverse Debye length                                                                               | $\kappa$         | calculated                                 | m <sup>-1</sup>    |

### *Ionic strength*

Nanoparticles are often incorporated into  $\mu$ PADs immediately after synthesis, such that ionic strength is not directly controlled.<sup>35-39</sup> However, ionic strength in nanoparticle solutions varies drastically depending upon the synthesis procedure employed. For instance, the reaction flask in which 15 nm cit-AuNP are produced contains 4 mM Cl<sup>-</sup>, 3.9 mM Na<sup>+</sup>, and 3.9 mM citrate at various states of oxidation in addition to Au, while PVP-AgNP production involves centrifugation steps to remove excess reagents. Hence, ionic strength values were inferred from reagents used, synthesis protocols, and conductivity measurements converted to ionic strength with a pre-factor of  $1.27 \times 10^{-6}$ .<sup>34</sup> Values were compared to determine reasonable DLVO inputs (Table S7).

**Table S7.** Ionic strength was estimated from conductivity measurements, synthesis protocols, and reagent concentrations.

| Sample                                    | Conductivity (mS/cm) | Ionic strength from pre-factor (mM) | Ionic strength from synthesis procedure (mM) | Ionic strength used for DLVO (mM) |
|-------------------------------------------|----------------------|-------------------------------------|----------------------------------------------|-----------------------------------|
| 15 nm cit-AuNP                            | 0.4                  | 0.5                                 | <13                                          | 0.5                               |
| 46 nm cit-AuNP                            | 0.3                  | 0.4                                 | <2                                           | 0.3                               |
| 15 nm BSA-cit-AuNP                        |                      |                                     | <13                                          | 0.5                               |
| 46 nm BSA-cit-AuNP                        | 0.2                  | 0.2                                 | <2                                           | 0.3                               |
| 64 nm BSA-cit-AuNP                        | 0.2                  | 0.2                                 | <2                                           | 0.3                               |
| 46 nm OCH <sub>3</sub> -PEG-cit-AuNP      | 0.002                | 0.002                               | 0.0002                                       | 0.007                             |
| 46 nm COOH-PEG-cit-AuNP                   | 0.002                | 0.003                               | 0.0002                                       | 0.007                             |
| 46 nm OCH <sub>3</sub> /COOH-PEG-cit-AuNP | 0.002                | 0.003                               | 0.0002                                       | 0.007                             |
| 46 nm MixPEG-MGITC-cit-AuNP               | 0.02                 | 0.02                                | 0.0002                                       | 0.007                             |
| 46 nm MixPEG-RBITC-cit-AuNP               | 0.004                | 0.005                               | 0.0002                                       | 0.007                             |
| 46 nm DNA-MixPEG-MGITC-cit-AuNP           | 0.009                | 0.01                                | 0.0002                                       | 0.007                             |
| 40 nm PVP10K-AgNP                         |                      |                                     | 0.0002                                       | 0.007                             |
| 40 nm PVP55K-AgNP                         |                      |                                     | 0.0002                                       | 0.007                             |
| 8 nm PVP55K-AgNP                          |                      |                                     | 0.0002                                       | 0.007                             |
| 8 nm PVP10K-AgNP                          |                      |                                     | 0.0002                                       | 0.007                             |

### *Hamaker constants*

Hamaker constants were calculated using a combined relations equation,

$$A_{132} = (A_{11}^{0.5} - A_{33}^{0.5})(A_{22}^{0.5} - A_{33}^{0.5})$$

and literature values (**Table S8**).<sup>32</sup> The combining relations equation breaks down in aqueous systems for which non-dispersive forces dominate, but because alternatives require parameters that are not widely available, the equation is often used as a reasonable estimate.<sup>32,40</sup>

**Table S8.** Hamaker constant DLVO inputs.  $A_{11}$  represents the Hamaker constant of medium 1 interacting with itself across a vacuum.  $A_{132}$  was computed with the equation  $A_{132} = (A_{11}^{0.5} - A_{33}^{0.5})(A_{22}^{0.5} - A_{33}^{0.5})$  and represents the Hamaker constant of medium 1 interacting with medium 2 across medium 3.<sup>32,40</sup>

| Medium                                | Hamaker constant<br>$A_{11}$ or $A_{132}$ (J) | Used to create Figure 4<br>for the nanoparticles listed | Reference  |
|---------------------------------------|-----------------------------------------------|---------------------------------------------------------|------------|
| Water                                 | $3.7 \times 10^{-20}$                         |                                                         | 32         |
| Cellulose                             | $8.4 \times 10^{-20}$                         |                                                         | 41-43      |
| Au bulk                               | $4.5 \times 10^{-19}$                         |                                                         | 44-46      |
| Ag bulk                               | $4.0 \times 10^{-19}$                         |                                                         | 44,45      |
| 10 nm AgNP                            | $2.1 \times 10^{-19}$                         |                                                         | 47         |
| 50 nm AgNP                            | $1.6 \times 10^{-19}$                         |                                                         | 47         |
| Polymer (general estimate)            | $6 \times 10^{-20}$                           |                                                         | 48,49      |
| BSA                                   | $2 \times 10^{-20}$                           |                                                         | 50-52      |
| DNA                                   | $6.8 \times 10^{-20}$                         |                                                         | 53,54      |
| $A_{\text{cellulose-water-AuNP}}$     | $4.69 \times 10^{-20}$                        | Cit-AuNP                                                | calculated |
| $A_{\text{cellulose-water-AgNP40nm}}$ | $1.97 \times 10^{-20}$                        |                                                         | calculated |
| $A_{\text{cellulose-water-AgNP8nm}}$  | $2.58 \times 10^{-20}$                        |                                                         | calculated |
| $A_{\text{cellulose-water-polymer}}$  | $5.1 \times 10^{-21}$                         | PVP-AgNP, PEG-cit-AuNP                                  | calculated |
| $A_{\text{cellulose-water-BSA}}$      | $-5.0 \times 10^{-21}$                        | BSA-cit-AuNP                                            | calculated |
| $A_{\text{cellulose-water-DNA}}$      | $6.7 \times 10^{-21}$                         | DNA-PEG-cit-AuNP                                        | calculated |

Hamaker constant estimates require knowledge of the wavelength dependent dielectric value for each media.<sup>32,41</sup> AuNP and AgNP do not have the same dielectric properties as their bulk counterparts; therefore, Hamaker constant values are expected to be different. The Hamaker constants as a function of nanoparticle size estimated by Pinchuk were used for AgNP, but these values have not been previously computed for AuNP.<sup>47</sup>

We note that when Hamaker constants for metal core materials were applied rather than Hamaker constants of the surface coatings, several particles experimentally contradicted DLVO predictions, placing them in the upper left corner of **Figure 4**, including 15 nm BSA-cit-AuNP at pH >6 and PVP-AgNP. Although it is standard procedure to apply the Hamaker constant of the bulk metal core material rather than the nanoparticle itself or the surface coating when computing van der Waals interaction energies, DLVO calculations were evaluated using both the nanoparticle metal core Hamaker constants as well as that of the surface coating material. In colloidal systems for which DLVO was developed, it was typically safe to assume that the bulk material was that of the particle core,<sup>32</sup> however, for nanomaterials on the order of 15-64 nm with surface coatings nearly doubling the hydrodynamic diameter, the metal core comprises

much less than 50% of the particle volume, and thus cannot necessarily be considered the “bulk”. Hamaker constants model van der Waals forces that work across short distances, and although it is generally assumed that the van der Waals forces due to the stabilizing coating are negligible at large distances, at a separation distance equal to the coating thickness the properties of the coating dominate.<sup>32</sup> The particle coatings analyzed herein are not trivial in size, as demonstrated by their molecular weights and the final hydrodynamic diameters (**Table 1**). Therefore, it is safer to assume coating properties are significant, arguably more so than the nanoparticle core.

A negative Hamaker constant for the interaction of a particle with a cellulose surface through water ( $A_{132}$ ) is computed for 15 nm BSA-cit-AuNP at pH 8 when the Hamaker constant for BSA interacting with itself in a vacuum ( $A_{11}=2\times 10^{-20}$  J) is applied rather than that of bulk Au (**Table S8**).<sup>50-52</sup> A negative  $A_{132}$  is produced when  $A_{11}$  for the particle is below that of water ( $3.7\times 10^{-20}$ ), as is the typical  $A_{11}$  of a protein ( $1-1.5\times 10^{-20}$  J).<sup>32,55</sup> The van der Waals attractive force never overcomes the electrostatic repulsion when the BSA Hamaker constant is applied to the DLVO model rather than that of Au bulk for the 15 nm BSA-cit-AuNP at pH 8 (**Figure S11A**), and the DLVO model predicts the experimental data despite the neglect of steric stabilization or Lewis acid-base forces in the model. Using the BSA Hamaker constant does not significantly influence the DLVO model output for pH 3 BSA-cit-AuNP of any size until a separation distance less than 0.1 nm (shorter than a carbon-carbon bond length) because the zeta potential of the nanoparticles is positive (**Figure S11B-C**). The BSA surface coating properties appear to be important in this case because the coating is thick in comparison to the particle size and the range of van der Waals forces and the BSA dictates charge as a function of pH.<sup>32</sup>

BSA NP travel can be logically explained by the surface charge alone. At pH >6 BSA-cit-AuNP have a positive surface charge, such that electrostatic forces between the particles and cellulose are attractive; therefore, travel of the nanoparticles is prevented in the negatively charged cellulose (**Figure S10**).<sup>22,33,56</sup> However, at pH >6, the zeta potential of BSA-cit-AuNP is negative, so the particles travel with the aqueous mobile phase rather than immediately depositing in the cellulose. The DLVO model does not predict the dramatic difference in transport distance for pH 3 vs. pH 6 BSA-cit-AuNP, unless the BSA Hamaker constant is used.

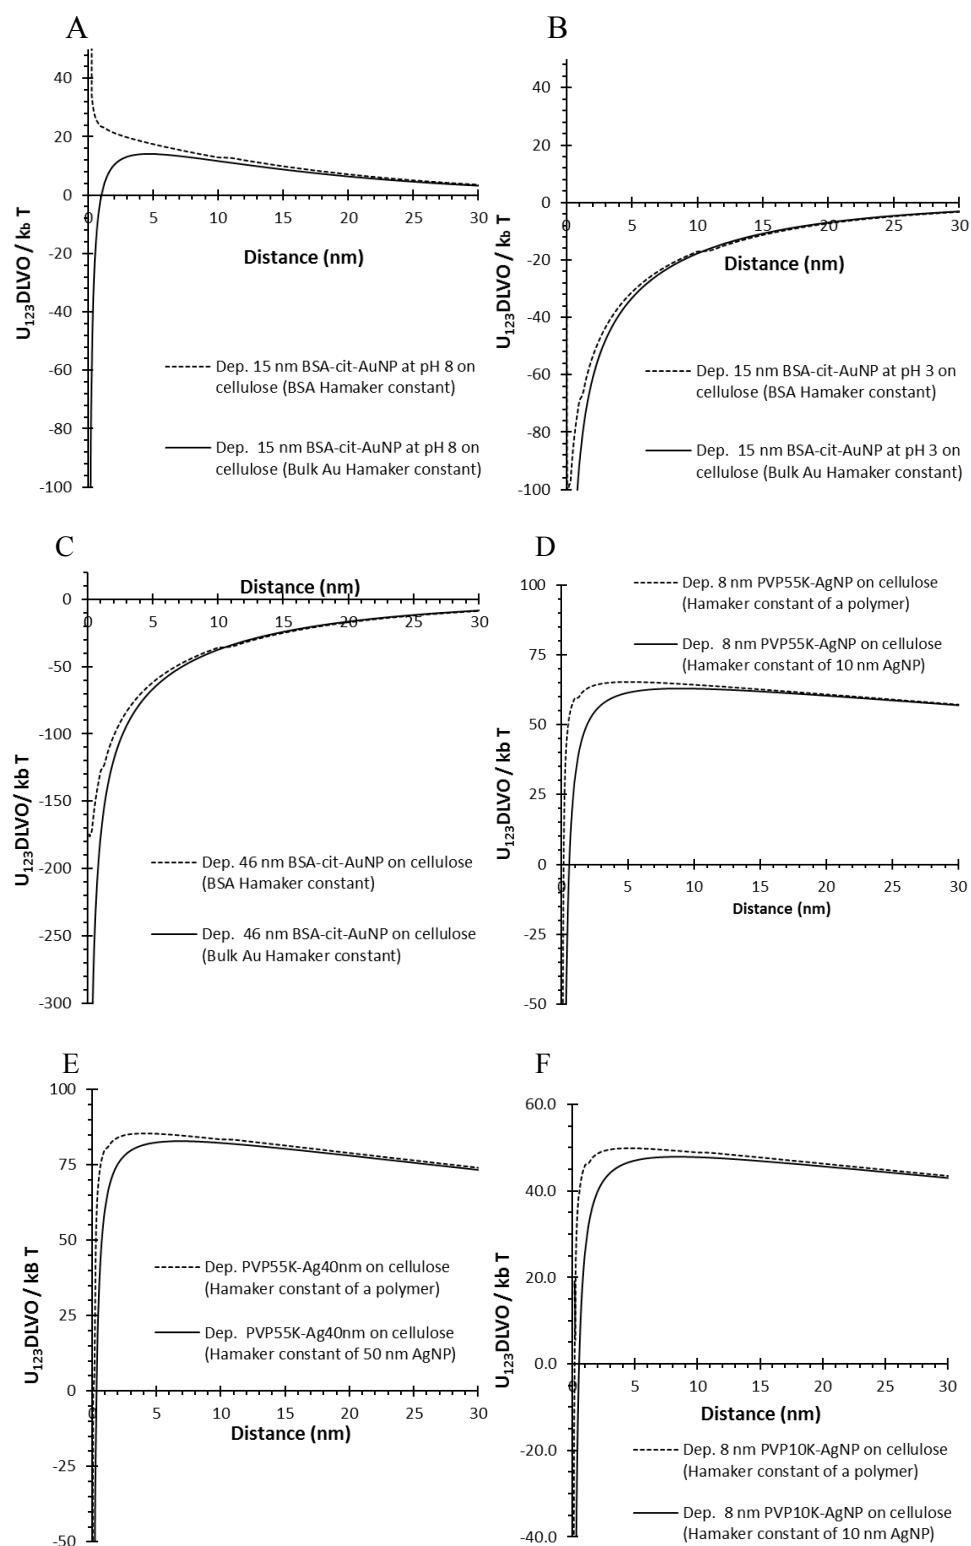

**Figure S11.** DLVO interaction energies computed using Hamaker constant values for the metal core (solid line) or for the surface coating (dotted line). A) 15 nm BSA-cit-AuNP, pH 8. B) 15 nm BSA-cit-AuNP, pH 3. C) 46 nm BSA-cit-AuNP. D) 8 nm PVP55K-AgNP. E) 40 nm PVP55K-AgNP. F) 8 nm PVP10K-AgNP.

For the interaction of PVP-AgNP with cellulose, replacing the Hamaker constant ( $A_{11}$ ) of AgNP used to model the PVP-AgNP with a value an order of magnitude smaller (a reasonable value for a polymer)<sup>48,49</sup> reduces  $A_{132}$  by an order of magnitude and increases the DLVO interaction energy barrier very slightly. A more significant effect of applying a polymer Hamaker constant is that the van der Waals attractive force does not overcome the electrostatic repulsive force until the particle is closer to the surface (1-3 nm as opposed to 3-5 nm), and the interaction between the PVP-AgNP and cellulose does not become attractive overall until a distance just over 0.1 nm (**Figure S11D-F**). DLVO suggests that electrostatic repulsion forces dominate until the PVP-AgNP approach within a typical bond length. Sterically, it is not likely that the particle would approach within this distance. Therefore, as observed, it is logical that the particles are not deposited in the cellulose.

## REFERENCES

1. Hull, M.S.; Chaurand, P.; Rose, J.; Auffan, M.; Bottero, J.Y.; Jones, J.C.; Schultz, I.R.; Vikesland, P.J., Filter-Feeding Bivalves Store and Biodeposit Colloidally Stable Gold Nanoparticles. *Environ. Sci. Technol.* **2011**, *45*, 6592-6599.
2. Ao, L.M.; Gao, F.; Pan, B.F.; Cui, D.X.; Gu, H.C., Interaction between Gold Nanoparticles and Bovine Serum Albumin or Sheep Antirabbit Immunoglobulin G. *Chin. J. Chem.* **2006**, *24*, 253-256.
3. Qian, X.; Peng, X.-H.; Ansari, D.O.; Yin-Goen, Q.; Chen, G.Z.; Shin, D.M.; Yang, L.; Young, A.N.; Wang, M.D.; Nie, S., In Vivo Tumor Targeting and Spectroscopic Detection with Surface-Enhanced Raman Nanoparticle Tags. *Nat. Biotechnol.* **2008**, *26*, 83-90.
4. Kennedy, A.J.; Hull, M.S.; Bednar, A.J.; Goss, J.D.; Gunter, J.C.; Bouldin, J.L.; Vikesland, P.J.; Steevens, J.A., Fractionating Nanosilver: Importance for Determining Toxicity to Aquatic Test Organisms. *Environ. Sci. Technol.* **2010**, *44*, 9571-9577.
5. Ma, R.; Levard, C.; Marinakos, S.M.; Cheng, Y.; Liu, J.; Michel, F.M.; Brown, G.E., Jr.; Lowry, G.V., Size-Controlled Dissolution of Organic-Coated Silver Nanoparticles. *Environ. Sci. Technol.* **2012**, *46*, 752-759.
6. Haiss, W.; Thanh, N.T.; Aveyard, J.; Fernig, D.G., Determination of Size and Concentration of Gold Nanoparticles from UV-Vis Spectra. *Anal. Chem.* **2007**, *79*, 4215-21.
7. Gao, P.; Weaver, M.J., Metal-Adsorbate Vibrational Frequencies as a Probe of Surface Bonding: Halides and Pseudohalides at Gold Electrodes. *J. Phys. Chem.* **1986**, *90*, 4057-4063.
8. Jeffrey, M.I.; Watling, K.; Hope, G.A.; Woods, R., Identification of Surface Species That Inhibit and Passivate Thiosulfate Leaching of Gold. *Miner. Eng.* **2008**, *21*, 443-452.
9. Gao, P.; Weaver, M.J., Surface-Enhanced Raman Spectroscopy as a Probe of Adsorbate-Surface Bonding: Benzene and Monosubstituted Benzenes Adsorbed at Gold Electrodes. *J. Phys. Chem.* **1985**, *89*, 5040-5046.
10. Chowdhury, J.; Ghosh, M., Concentration-Dependent Surface-Enhanced Raman Scattering of 2-Benzoylpyridine Adsorbed on Colloidal Silver Particles. *J. Colloid Interface Sci.* **2004**, *277*, 121-127.
11. Ravindranath, S.P.; Henne, K.L.; Thompson, D.K.; Irudayaraj, J., Raman Chemical Imaging of Chromate Reduction Sites in a Single Bacterium Using Intracellularly Grown Gold Nanoislands. *ACS Nano* **2011**, *5*, 4729-4736.
12. Bozzini, B.; Romanello, V.; Mele, C., A SERS Investigation of the Electrodeposition of Au in a Phosphate Solution. *Surf. Coat. Technol.* **2007**, *201*, 6267-6272.
13. Joo, S.W.; Han, S.W.; Kim, K., Adsorption Characteristics of 1,3-Propanedithiol on Gold: Surface-Enhanced Raman Scattering and Ellipsometry Study. *J. Phys. Chem. B* **2000**, *104*, 6218-6224.
14. Jing, C.; Fang, Y., Experimental (SERS) and Theoretical (DFT) Studies on the Adsorption Behaviors of L-Cysteine on Gold/Silver Nanoparticles. *Chem. Phys.* **2007**, *332*, 27-32.
15. Zhang, D.; Neumann, O.; Wang, H.; Yuwono, V.M.; Barhoumi, A.; Perham, M.; Hartgerink, J.D.; Wittung-Stafshede, P.; Halas, N.J., Gold Nanoparticles Can Induce the

- Formation of Protein-Based Aggregates at Physiological pH. *Nano Lett.* **2009**, *9*, 666-671.
16. Carrilho, E.; Martinez, A.W.; Whitesides, G.M., Understanding Wax Printing: A Simple Micropatterning Process for Paper-Based Microfluidics. *Anal. Chem.* **2009**, *81*, 7091-7095.
  17. Lu, Y.; Shi, W.; Jiang, L.; Qin, J.; Lin, B., Rapid Prototyping of Paper-Based Microfluidics with Wax for Low-Cost, Portable Bioassay. *Electrophoresis* **2009**, *30*, 1497-1500.
  18. Martinez, A.W.; Phillips, S.T.; Whitesides, G.M.; Carrilho, E., Diagnostics for the Developing World: Microfluidic Paper-Based Analytical Devices. *Anal. Chem.* **2010**, *82*, 3-10.
  19. Breton, M.P.; Malhotra, S.L.; Kovacs, G.J. Ink Compositions. US Patent 6,593,398, July 15, 2003.
  20. Malhotra, S.L.; Wong, R.W.; Breton, M.P. Ink Compositions. US Patent 6,461,417, October 8, 2002.
  21. Malhotra, S.L.; Wong, R.W.; Breton, M.P. Phase Change Inks. US Patent 6,306,203, October 23, 2001.
  22. Pelton, A Model of the External Surface of Wood Pulp Fibers. *Nord. Pulp Pap. Res. J.* **1993**, *08*, 113-119.
  23. Tobin, M.C., *Laser Raman Spectroscopy*. John Wiley & Sons, Inc.: Toronto, Canada, 1971; Vol. 35.
  24. Movasaghi, Z.; Rehman, S.; Rehman, I.U., Raman Spectroscopy of Biological Tissues. *Appl. Spectrosc. Rev.* **2007**, *42*, 493 - 541.
  25. Edwards, H.G.M.; Falk, M.J.P., Fourier-Transform Raman Spectroscopic Study of Unsaturated and Saturated Waxes. *Spectrochim. Acta, Part A* **1997**, *53*, 2685-2694.
  26. Mernagh, T.P.; Cooney, R.P.; Johnson, R.A., Raman Spectra of Graphon Carbon Black. *Carbon* **1984**, *22*, 39-42.
  27. Kunjappu, J.T., Ink Chemistry. In *Chemistry World*, Royal Society of Chemistry 2003.
  28. Zheng, M.; Du, W., Phase Behavior, Conformations, Thermodynamic Properties, and Molecular Motion of Multicomponent Paraffin Waxes: A Raman Spectroscopy Study. *Vib. Spectrosc.* **2006**, *40*, 219-224.
  29. Noh, H.; Phillips, S.T., Metering the Capillary-Driven Flow of Fluids in Paper-Based Microfluidic Devices. *Anal. Chem.* **2010**, *82*, 4181-4187.
  30. Kreze, T.; Stana-Kleinschek, K.; Ribitsch, V., The Sorption Behaviour of Cellulose Fibres. *Lenzinger Ber.* **2001**, *80*, 28-33.
  31. Brant, J.; Labille, J.; Bottero, J.-Y.; Wiesner, M.R., Nanoparticle Transport, Aggregation, and Deposition. In *Environmental Nanotechnology Applications and Impacts of Nanomaterials*, Wiesner, M.R.; Bottero, J.-Y., Eds. McGraw-Hill: New York, 2007; pp 231-294.
  32. Israelachvili, J.N., *Intermolecular and Surface Forces*. Third ed.; Elsevier: 2011.
  33. Dagaonkar, M.; Majumdar, U., Effect of Fluid Flow, Solution Chemistry and Surface Morphology of Fibrous Material on Colloid Filtration. *J. Eng. Fibers Fabr.* **2012**, *7*, 62-74.
  34. Zeng, Y.; Grandner, S.; Oliveira, C.L.P.; Thunemann, A.F.; Paris, O.; Pedersen, J.S.; Klapp, S.H.L.; von Klitzing, R., Effect of Particle Size and Debye Length on Order



- Parameters of Colloidal Silica Suspensions under Confinement. *Soft Matter* **2011**, *7*, 10899-10909.
35. Yu, W.W.; White, I.M., A Simple Filter-Based Approach to Surface Enhanced Raman Spectroscopy for Trace Chemical Detection. *Analyst* **2012**, *137*, 168-173.
  36. Lee, C.H.; Hankus, M.E.; Tian, L.; Pellegrino, P.M.; Singamaneni, S., Highly Sensitive Surface Enhanced Raman Scattering Substrates Based on Filter Paper Loaded with Plasmonic Nanostructures. *Anal. Chem.* **2011**, *83*, 8953-8958.
  37. Abbas, A.; Brimer, A.; Slocik, J.M.; Tian, L.; Naik, R.R.; Singamaneni, S., Multifunctional Analytical Platform on a Paper Strip: Separation, Preconcentration, and Subattomolar Detection. *Anal. Chem* **2013**, *85*, 3977-3983.
  38. Ngo, Y.H.; Li, D.; Simon, G.P.; Garnier, G., Gold Nanoparticle–Paper as a Three-Dimensional Surface Enhanced Raman Scattering Substrate. *Langmuir* **2012**, *28*, 8782-8790.
  39. Lee, C.H.; Tian, L.; Singamaneni, S., Paper-Based Sers Swab for Rapid Trace Detection on Real-World Surfaces. *ACS Appl. Mater. Interfaces* **2010**, *2*, 3429-3435.
  40. Lefèvre, G.; Jolivet, A. In *Calculation of Hamaker Constants Applied to the Deposition of Metallic Oxide Particles at High Temperature*, International Conference on Heat Exchanger Fouling and Cleaning VIII, Schlading, Austria, 2009; HMuller-Steinhagen, H.; Malayeri, M.R.; Watkinson, A.P., Eds. Heat Exchanger-Fouling: Schlading, Austria, 2009; pp 120-124.
  41. Qing, S., Surface Properties of Cellulose and Cellulose Derivatives: A Review. In *Model Cellulosic Surfaces*, Roman, M., Ed. American Chemical Society: 2009; Vol. 1019, pp 259-289.
  42. Holmberg, M.; Berg, J.; Stemme, S.; Ödberg, L.; Rasmusson, J.; Claesson, P., Surface Force Studies of Langmuir–Blodgett Cellulose Films. *J. Colloid Interface Sci.* **1997**, *186*, (2), 369-381.
  43. Bergström, L.; Stemme, S.; Dahlfors, T.; Arwin, H.; Ödberg, L., Spectroscopic Ellipsometry Characterisation and Estimation of the Hamaker Constant of Cellulose. *Cellulose* **1999**, *6*, (1), 1-13.
  44. Bargeman, D.; van Voorst Vader, F., Van Der Waals Forces between Immersed Particles. *J. Electroanal. Chem. Interfacial Electrochem.* **1972**, *37*, 45-52.
  45. Parsegian, V.A.; Weiss, G.H., Spectroscopic Parameters for Computation of Van Der Waals Forces. *J. Colloid Interface Sci.* **1981**, *81*, 285-289.
  46. Biggs, S.; Mulvaney, P., Measurement of the Forces between Gold Surfaces in Water by Atomic Force Microscopy. *J. Chem. Phys.* **1994**, *100*, 8501-8505.
  47. Pinchuk, A.O., Size-Dependent Hamaker Constant for Silver Nanoparticles. *J. Phys. Chem. C* **2012**, *116*, 20099-20102.
  48. Vial, J.; Carré, A., Calculation of Hamaker Constant and Surface Energy of Polymers by a Simple Group Contribution Method. *Int. J. Adhes. Adhes.* **1991**, *11*, 140-143.
  49. Bhattacharya, S.N.; Kamal, M.R.; Gupta, R.K., *Polymeric Nanocomposites: Theory and Practice*. Hanser Gardner Publications: 2008.
  50. Prasanna, P.R.M.; Chemical, T.U.; Engineering, B., *Application of Secondary Nucleation Models to Polymorphic Systems*. Tufts University: 2008.
  51. Srivastava, S.N., Estimate of the Hamaker Constant for Bovine Serum Albumin and a Test of Vold's Theory of the Effect of Adsorption on the van Der Waals Interaction. *Z. Phys. Chem* **1966**, *233*, 237-254.

52. Visser, J., The Concept of Negative Hamaker Coefficients. 1. History and Present Status. *Adv. Colloid Interface Sci.* **1981**, *15*, 157-169.
53. Paillusson, F.; Dahirel, V.; Jardat, M.; Victor, J.M.; Barbi, M., Effective Interaction between Charged Nanoparticles and DNA. *Phys. Chem. Chem. Phys.* **2011**, *13*, 12603-13.
54. Nelson, E.M.; Rochester, U.o., *The Adsorption of DNA onto Unmodified Gold Nanoparticles*. University of Rochester: 2008.
55. Hiemenz, P.C.; Rajagopalan, R., *Principles of Colloid and Surface Chemistry*. Third ed.; CRC Press: Boca Raton, FL, 1997.
56. Stana, K.K.; Pohar, C.; Ribitsch, V., Adsorption of Whitening Agents on Cellulose Fibers — Monitored by Streaming Potential Measurements, Calorimetry and Fluorescence. *Colloid Polym. Sci.* **1995**, *273*, 1174-1178.
